# Supplementary material
Source: PubMed Central journal article supplement (PMC2200841)
Supplement: blood_blood-2007-04-085670_1.pdf [file blood_blood-2007-04-085670_1.pdf]

### *Sequencing*

All exons of the JAK3 pseudokinase domain were amplified by PCR and submitted for sequencing by the Northwestern University. PCR conditions for exons 11-14 and 16

were as follows: 94° for 5', then 35 cycles of 94° for 30", 58° for 1', and 72° for 1', followed by 72° for 10'. PCR conditions for exons 10 and 15 were identical to those

above except for 60° annealing. n=3 Ts65Dn; n=3 controls. Primer sequences are as

follows:

10F: CAGGTCCCAGTTCCATGC

10R: CTTTTGGGAGGACGTGGAAG

11F: GGGGAGGAATCCATCTGTCT

11R: ATTAGCTGGCAAGGTGGAAA

12F: TGTCACCTGAATCACCACCA

12R: GCTCCTATCCAAACTACAGAACC

13F: GCTTTGAAGGATGCAGGAGA

13R: GTCCAGGCCCTGTGTGAC

14F: TGTGCAAAGGTGACCATGAC

14R: GATATCCCCCTCCCCTCAC

15F: TTAAATCGCGAGCTGAGCAT

15R: CCAGCTCAGGGACCCTCT

16F: GGCAGAGACTTACCACTTACCC

16R: CAGTGTCCACCTGACCCATC

### *Folate detection*

Whole blood was collected from the retroorbital sinus into EDTA coated tubes. Radioimmulogic assay (RIA) for plasma and RBC folate was conducted by Ani Lytics, Inc. Gaithersburg, MD.
