# Supplementary material
Source: PubMed Central journal article supplement (PMC2200841)
Supplement: blood_blood-2007-04-085670_2.pdf [file blood_blood-2007-04-085670_2.pdf]

| #  | Name               | Class | Domain, functional associations and similarities                                                                                     |
|----|--------------------|-------|--------------------------------------------------------------------------------------------------------------------------------------|
| 1  | PRED22-MRPL39      | C     | Mitochondrial ribosomal protein L39                                                                                                  |
| 2  | C21orf43-JAM2      | C     | Vascular endothelial junction-associated protein; immunoglobulin superfamily                                                         |
| 3  | ATP5A              | C     | ATP synthase, H <sup>+</sup> transporting, mitochondrial F0 complex, subunit F6 (ATP5J), nuclear gene encoding mitochondrial protein |
| 4  | GABPA              | C     | nuclear respiratory factor-2 subunit alpha; ETS domain transcription factor                                                          |
| 5  | APP                | C     | amyloid beta (A4) precursor protein (protease nexin-II, Alzheimer disease)                                                           |
| 6  | CYYR1              | C     | Cysteine, tyrosine-rich                                                                                                              |
| 7  | ADAMTS1            | C     | matrix metalloprotease                                                                                                               |
| 8  | ADAMTS5            | C     | a disintegrin-like and metalloprotease (reprolysin type) with thrombospondin type 1 motif, 5 (aggrecanase-2)                         |
| 9  | N6AMT1-PRED28      | C     | Putative N6-DNA-methyltransferase                                                                                                    |
| 10 | ZNF294             | C     | Ring-finger domain                                                                                                                   |
| 11 | C21orf6            | C     | Ring-finger domain and WD repeat domain                                                                                              |
| 12 | USP16              | C     | Ubiquitin processing protease (Ubp-M)                                                                                                |
| 13 | CCT8               | C     | Chaperonin containing TCP1, subunit 8 (theta)                                                                                        |
| 14 | C21orf7            | C     | TAB2 binding domain of TAK1; interleukin 1 signaling pathway                                                                         |
| 15 | BACH1              | C     | ?                                                                                                                                    |
| 16 | as-BACH1           | MC    | BTB-basic leucine zipper transcription factor                                                                                        |
| 17 | GRIK1              | C     | Glutamate receptor (GLUR5)                                                                                                           |
| 18 | AK016377           | C     |                                                                                                                                      |
| 19 | CLDN17             | C     | Cell adhesion molecule at tight junctions; 4 transmembrane domains                                                                   |
| 20 | CLDN8              | C     | Cell adhesion molecule at tight junctions; 4 transmembrane domains                                                                   |
| 21 | KRTAPcluster       | C     |                                                                                                                                      |
| 22 | TIAM1              | C     | G-nucleotide exchange factor for Rac                                                                                                 |
| 23 | SOD1               | C     | Superoxide dismutase                                                                                                                 |
| 24 | SFRS15             | C     | Similar to pre-mRNA splicing SR proteins                                                                                             |
| 25 | MAK5-HUNK          | C     | Hormonally upregulated Neu-associated kinase                                                                                         |
| 26 | BI731159           | MC    |                                                                                                                                      |
| 27 | C21orf45           | C     |                                                                                                                                      |
| 28 | C21orf61           | C     | Transmembrane domain; fat cell-specific low molecular weight protein beta (FALP)                                                     |
| 29 | C21orf108-KIAA0539 | C     | 6 transmembrane domains                                                                                                              |
| 30 | C21orf63           | C     | 2 SUEL domains (galactose-binding lectin domains)                                                                                    |
| 31 | C21orf59           | C     | Phosphoinositol phosphatase                                                                                                          |
| 32 | SYNJ1              | C     |                                                                                                                                      |
| 33 | GCFC-C21orf66      | C     | Spliceosomal-associated                                                                                                              |
| 34 | C21orf62           | C     | Signal sequence                                                                                                                      |
| 35 | Olig2-bHLHoleg2    | C     | basic helix-loop-helix transcription factor class B 1 (BHLHB1)                                                                       |
