# Supplementary material
Source: PubMed Central journal article supplement (PMC2200841)
Supplement: blood_blood-2007-04-085670_3.pdf [file blood_blood-2007-04-085670_3.pdf]

|                                          | <b>Months</b>          |                        |                        |                     |                        |
|------------------------------------------|------------------------|------------------------|------------------------|---------------------|------------------------|
| <b>WBC (K/<math>\mu</math>l)</b>         | <b>3</b>               | <b>6</b>               | <b>9</b>               | <b>12</b>           | <b>15</b>              |
| Control                                  | 10.29 $\pm$ .63        | 11.20 $\pm$ .65        | 10.46 $\pm$ .6         | 11.09 $\pm$ .96     | 12.96 $\pm$ .93        |
| Ts65Dn                                   | 11.29 $\pm$ .70        | 12.62 $\pm$ .82        | 11.21 $\pm$ .82        | 12.66 $\pm$ .75     | 10.54 $\pm$ .68        |
| <i>p-value</i>                           | 0.31                   | 0.18                   | 0.46                   | 0.29                | 0.11                   |
| <b>Neutrophils (K/<math>\mu</math>l)</b> |                        |                        |                        |                     |                        |
| Control                                  | 2.26 $\pm$ .19         | 2.62 $\pm$ .23         | 2.55 $\pm$ .19         | 2.80 $\pm$ .27      | 2.25 $\pm$ .35         |
| Ts65Dn                                   | 2.76 $\pm$ .38         | 3.17 $\pm$ .27         | 3.20 $\pm$ .28         | 3.75 $\pm$ .52      | 2.05 $\pm$ .37         |
| <i>p-value</i>                           | 0.22                   | 0.14                   | 0.06                   | 0.09                | 0.7                    |
| <b>Monocytes (K/<math>\mu</math>l)</b>   |                        |                        |                        |                     |                        |
| Control                                  | .45 $\pm$ .04          | .54 $\pm$ .04          | .49 $\pm$ .03          | .59 $\pm$ .07       | .97 $\pm$ .09          |
| Ts65Dn                                   | .60 $\pm$ .05          | .80 $\pm$ .06          | .62 $\pm$ .05          | .65 $\pm$ .07       | .95 $\pm$ .08          |
| <i>p-value</i>                           | .04                    | .001                   | .04                    | .56                 | .87                    |
| <b>Lymphocytes (K/<math>\mu</math>l)</b> |                        |                        |                        |                     |                        |
| Control                                  | 7.28 $\pm$ .48         | 7.88 $\pm$ .45         | 7.16 $\pm$ .48         | 7.43 $\pm$ .72      | 9.60 $\pm$ .82         |
| Ts65Dn                                   | 7.59 $\pm$ .47         | 8.42 $\pm$ .71         | 7.28 $\pm$ .67         | 7.93 $\pm$ .51      | 7.42 $\pm$ .49         |
| <i>p-value</i>                           | .66                    | .51                    | .89                    | .65                 | .05                    |
| <b>RBC (M/<math>\mu</math>l)</b>         |                        |                        |                        |                     |                        |
| Control                                  | 9.67 $\pm$ .14         | 9.90 $\pm$ .14         | 9.83 $\pm$ .29         | 9.48 $\pm$ .22      | 9.27 $\pm$ .16         |
| Ts65Dn                                   | 8.41 $\pm$ .12         | 8.4 $\pm$ .13          | 8.10 $\pm$ .21         | 8.07 $\pm$ .16      | 7.45 $\pm$ .20         |
| <i>p-value</i>                           | 1.7 x 10 <sup>-7</sup> | 1.1 x 10 <sup>-8</sup> | 0.00019                | 0.00012             | 3.4 x 10 <sup>-6</sup> |
| <b>Hemoglobin (g/dL0)</b>                |                        |                        |                        |                     |                        |
| Control                                  | 15.47 $\pm$ .15        | 15.12 $\pm$ .20        | 14.30 $\pm$ .26        | 14.16 $\pm$ .28     | 13.42 $\pm$ .23        |
| Ts65Dn                                   | 14.45 $\pm$ .21        | 13.66 $\pm$ .20        | 12.90 $\pm$ .37        | 12.9 $\pm$ .26      | 11.98 $\pm$ .29        |
| <i>p-value</i>                           | 0.0002                 | 6.4 x 10 <sup>-5</sup> | 0.004                  | 0.007               | 0.001                  |
| <b>Hematocrit (%)</b>                    |                        |                        |                        |                     |                        |
| Control                                  | 49.11 $\pm$ .70        | 51.16 $\pm$ 1.11       | 47.46 $\pm$ 1.51       | 47.05 $\pm$ 1.05    | 43.13 $\pm$ 1.21       |
| Ts65Dn                                   | 47.29 $\pm$ .77        | 47.50 $\pm$ 1.56       | 42.59 $\pm$ 1.17       | 44.45 $\pm$ 1.05    | 39.9 $\pm$ 1.23        |
| <i>p-value</i>                           | 0.10                   | 0.06                   | 0.03                   | 0.13                | 0.10                   |
| <b>MCV (fL)</b>                          |                        |                        |                        |                     |                        |
| Control                                  | 50.86 $\pm$ .48        | 51.74 $\pm$ .98        | 48.30 $\pm$ .60        | 49.81 $\pm$ .94     | 46.48 $\pm$ .86        |
| Ts65Dn                                   | 56.22 $\pm$ .80        | 56.46 $\pm$ 1.56       | 52.69 $\pm$ 1.03       | 55.27 $\pm$ 1.91    | 53.57 $\pm$ 1.02       |
| <i>p-value</i>                           | 4.6 x 10 <sup>-7</sup> | 0.01                   | 0.0005                 | .005                | 9.7 x 10 <sup>-5</sup> |
| <b>MCH (pg)</b>                          |                        |                        |                        |                     |                        |
| Control                                  | 16.05 $\pm$ .17        | 15.30 $\pm$ .19        | 14.64 $\pm$ .21        | 15.01 $\pm$ .26     | 14.49 $\pm$ .24        |
| Ts65Dn                                   | 17.18 $\pm$ .23        | 16.24 $\pm$ .20        | 15.94 $\pm$ .27        | 16.03 $\pm$ .46     | 16.11 $\pm$ .32        |
| <i>p-value</i>                           | 0.0003                 | .002                   | 0.0007                 | 0.04                | 0.001                  |
| <b>Platelets (K/<math>\mu</math>l)</b>   |                        |                        |                        |                     |                        |
| Control                                  | 764 $\pm$ 22.67        | 775.13 $\pm$ 19.18     | 681.9 $\pm$ 25.02      | 768.0 $\pm$ 32.14   | 855.9 $\pm$ 40.0       |
| Ts65Dn                                   | 882.5 $\pm$ 52.8       | 978.63 $\pm$ 70.0      | 956.5 $\pm$ 64.6       | 1263.82 $\pm$ 141.9 | 1752.33 $\pm$ 197.8    |
| <i>p-value</i>                           | 0.03                   | 0.002                  | 9.5 x 10 <sup>-5</sup> | 0.00013             | 0.00038                |
