# Supplementary material
Source: PubMed Central journal article supplement (PMC2200841)
Supplement: blood_blood-2007-04-085670_4.pdf [file blood_blood-2007-04-085670_4.pdf]

| Folate ng/ml |        |          |
|--------------|--------|----------|
|              | Plasma | RBC      |
| Control      | 56.7 ± | 1421.6 ± |
|              | 12.4   | 122.0    |
|              | 55.8 ± | 1537.7 ± |
| Ts65Dn       | 11.2   | 69.7     |
