# Supplementary material
Source: PubMed Central journal article supplement (PMC2200841)
Supplement: blood_blood-2007-04-085670_5.pdf [file blood_blood-2007-04-085670_5.pdf]

|                                          | <b>Month</b>       |                    |
|------------------------------------------|--------------------|--------------------|
|                                          | 3                  | 6                  |
| <b>WBC (K/<math>\mu</math>l)</b>         |                    |                    |
| Control                                  | 20.72 $\pm$ 3.45*  | 25.41 $\pm$ 2.18   |
| Ts65Dn                                   | 11.71 $\pm$ 2.12*  | 17.06 $\pm$ 3.00   |
| <b>Neutrophils (K/<math>\mu</math>l)</b> |                    |                    |
| Control                                  | 2.36 $\pm$ 0.50    | 4.76 $\pm$ 0.29    |
| Ts65Dn                                   | 1.88 $\pm$ 0.43    | 1.48 $\pm$ 0.21    |
| <b>Monocytes (K/<math>\mu</math>l)</b>   |                    |                    |
| Control                                  | 1.40 $\pm$ 0.24*   | 1.14 $\pm$ 0.04*   |
| Ts65Dn                                   | 0.71 $\pm$ 0.16*   | 0.55 $\pm$ 0.01*   |
| <b>Lymphocytes (K/<math>\mu</math>l)</b> |                    |                    |
| Control                                  | 16.72 $\pm$ 2.68*  | 19.04 $\pm$ 1.96*  |
| Ts65Dn                                   | 8.94 $\pm$ 1.67*   | 10.09 $\pm$ 1.90*  |
| <b>RBC (M/<math>\mu</math>l)</b>         |                    |                    |
| Control                                  | 10.13 $\pm$ 0.21** | 7.95 $\pm$ 0.93    |
| Ts65Dn                                   | 8.32 $\pm$ 0.15**  | 7.94 $\pm$ 0.015   |
| <b>Hemoglobin (g/dL)</b>                 |                    |                    |
| Control                                  | 14.04 $\pm$ 0.41*  | 13.56 $\pm$ 0.20   |
| Ts65Dn                                   | 12.1 $\pm$ 0.30*   | 13.25 $\pm$ 0.15   |
| <b>Hematocrit (%)</b>                    |                    |                    |
| Control                                  | 45.38 $\pm$ 1.03*  | 34.76 $\pm$ 4.17   |
| Ts65Dn                                   | 40.10 $\pm$ 1.11*  | 39.90 $\pm$ 0.09   |
| <b>MCV (fL)</b>                          |                    |                    |
| Control                                  | 44.84 $\pm$ 0.62*  | 43.62 $\pm$ 0.34   |
| Ts65Dn                                   | 49.28 $\pm$ 1.21*  | 50.25 $\pm$ 1.05** |
| <b>MCH (pg)</b>                          |                    |                    |
| Control                                  | 13.86 $\pm$ 0.30*  | 18.34 $\pm$ 2.77   |
| Ts65Dn                                   | 14.74 $\pm$ 0.25*  | 16.7 $\pm$ 0.2     |
| <b>Platelets (K/<math>\mu</math>l)</b>   |                    |                    |
| Control                                  | 871.2 $\pm$ 87.43  | 678.6 $\pm$ 97.63  |
| Ts65Dn                                   | 950.5 $\pm$ 95.45  | 674.0 $\pm$ 21.0   |
