# Supplementary material
Source: PubMed Central journal article supplement (PMC2200841)

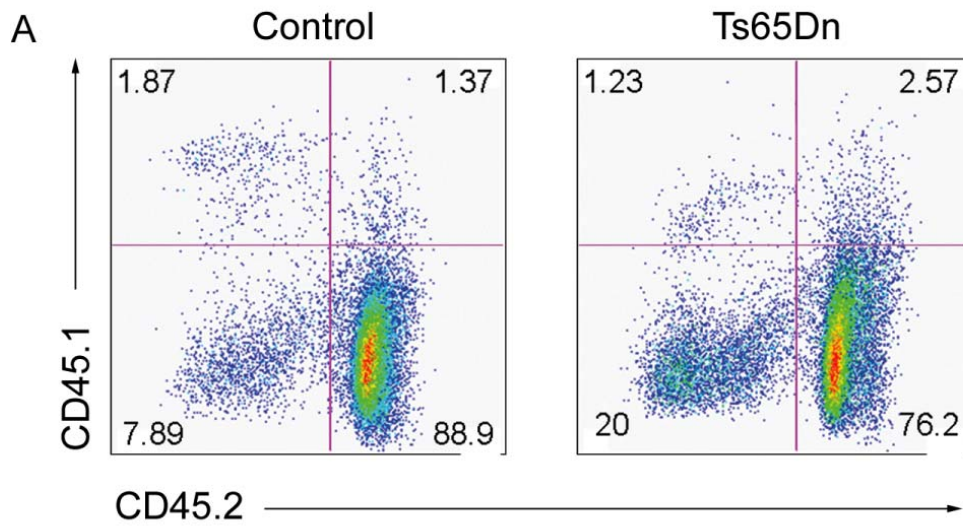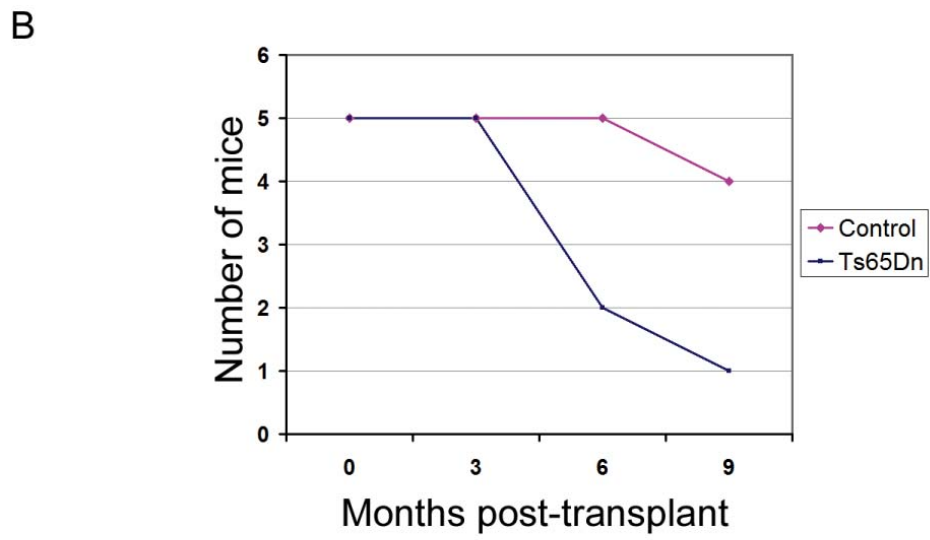

Supplement: blood_blood-2007-04-085670_6.pdf [file blood_blood-2007-04-085670_6.pdf]
